# Supplementary material for: Albuminuria Is Affected by Urinary Tract Infection: A Comparison between Biochemical Quantitative Method and Automatic Urine Chemistry Analyzer UC-3500
Source: MDPI journal article supplement (doi:10.3390/diagnostics13213366), 2023-11-02
Supplement: s1 [file s1]

**Supplement Table S1.** Results of UTISA questionnaire after antibiotic treatment between different albuminuria groups.

| Median (IQR)            | Negative<br>albuminuria<br>(N=19) | Transient<br>albuminuria<br>(N=24) | Persistent<br>albuminuria<br>(N=11) | p-value |
|-------------------------|-----------------------------------|------------------------------------|-------------------------------------|---------|
| Q1 Frequency            | 0 (0–1)                           | 0 (0–1)                            | 0 (0–1)                             | 0.682   |
| Q2 Urgency              | 0 (0–1)                           | 0 (0–1)                            | 0 (0–1)                             | 0.830   |
| Q3 Dysuria              | 0 (0–1)                           | 0 (0–0)                            | 0 (0–0.75)                          | 0.306   |
| Q4 Incomplete emptying  | 0 (0–1)                           | 0 (0–0)                            | 0 (0–1)                             | 0.143   |
| Q5 Lower abdominal pain | 0 (0–0)                           | 0 (0–0)                            | 0 (0–1)                             | 0.410   |
| Q6 Low back pain        | 0 (0–0)                           | 0 (0–0)                            | 0 (0–1)                             | 0.292   |
| Q7 Gross hematuria      | 0 (0–0)                           | 0 (0–0)                            | 0 (0–0)                             | 0.398   |
| Total score             | 1 (0–5.75)                        | 1 (0–2.5)                          | 1 (0.25–4)                          | 0.486   |
